# Supplementary material for: Malignancy Associated with Low-Risk HPV6 and HPV11: A Systematic Review and Implications for Cancer Prevention
Source: MDPI journal article supplement (doi:10.3390/cancers15164068), 2023-08-11
Supplement: s1 [file s1]

**Supplementary Table S1.** HPV6, HPV11 and HPV16 E5, E6 and E7 protein sequences.

| Gene       | Protein sequence                                                                                                                                                            | HPV type | Reference   |
|------------|-----------------------------------------------------------------------------------------------------------------------------------------------------------------------------|----------|-------------|
| HPV16-E6   | MHQKRTAMFQDPQERPRKLPQLCTELQTTIHDIILECVYCKQQLLRREVYD<br>FAFRDLCIVYRDGNPYAVCDKCLKFYISKISEYRHYCYSLYGTTLEQQYNKPL<br>CDLLIRCINCQKPLCPEEKQRHLDKKQRFHNIRGRWTGRCMSSCRSSRTRR<br>ETQL | 16       | NP_041325.1 |
| HPV16-E7   | MHGDTPTLHEYMLDLQPETTDLYCYEQLNDSSEEEDEIDGPAGQAEPDRA<br>HYNIVTFCCCKCDSTLRLCVQSTHVDIRTLEDLLMGTLGIVCPICSQKP                                                                     | 16       | NP_041326.1 |
| HPV16-E5   | MTNLDTASTTLLACFLLCFCVLLCVCLLIRPLLLSVSTYTSLLILVLLLWITAAS<br>AFRCFIVYIIFVYIPLFLIHTHARFLIT                                                                                     | 16       | NP_041330.2 |
| HPV18*-E6  | MARFEDPTRRPYKLPDLCTELNTSLQDIEITCVYCKTVLELTVFEFAFKDLF<br>VVYRDSIPHAACHKCIDFYSRIRELRHYSDSVYGDLEKLTNTGLYNLLIRCL<br>RCQKPLNPAEKLRLHLEKRRFHNIAGHYRGQCHSCCNRARQERLQRRRET<br>QV    | 18       | NP_040310.1 |
| HPV18*-E7  | MHGPKATLQDIVLHLEPQNEIPVDLLCHEQLSDSEENDEIDGVNHQHLPAR<br>RAEPQRHTMLCMCKCEAIELVVESSADDLRAFQQLFLNLTLSFVCPWCASQ<br>Q                                                             | 18       | NP_040311.1 |
| HPV18*-E5  | MLSLIFLCFCVCMYVCCHVPLLPVCMCAYAWVLVVFYIVVITSPATAFTV<br>YVFCFLPMLLLHIHAILSLQ                                                                                                  | 18       | NP_040315.1 |
| HPV6*-E6   | MESANASTSATTIDQLCKTFNLSMHTLQINCVFCKNALTTAEIYSYAYKHLK<br>VLFRGGYPYAAACACCLEFHGKINQYRHFYAGYATTVEEETKQDILDVLIR<br>CYLCHKPLCEVEKVKHILTKARFIKLNCTWKGRCCLHCWTTCMEDMLP             | 6        | NP_040296.1 |
| HPV6*-E7   | MHGRHVTLKDIVLDLQPPDPVGLHCYEQLVDSEDEVDEVDGQDSQPLKQ<br>HFQIVTCCCGCDNSVRLVVQCTETDIREVQQLLGLTNIVCPICAPKT                                                                        | 6        | NP_040297.1 |
| HPV6*-E5   | MMLTCQFNDGDTWLGLWLLCAFIVGMLGLLLPHYRAVQGDKHTKCKKC<br>NKHNCNDDYVTMHYTTDGDYIYMN                                                                                                | 6        | NP_040302.1 |
| HPV11*-E6  | MESKDASTSATSIDQLCKTFNLSLHTLQICVFCRNALTTAEIYAYAYKNLK<br>VVWRDNFPFAACACCLELQGKINQYRHFNYAAYAPTVEEETNEDILKVLIR<br>CYLCHKPLCEIEKLKHILGKARFIKLNNQWKGRCCLHCWTTCMEDLLP              | 11       | QXM18822.1  |
| HPV11*-E7  | MHGRLVTLKDIVLDLQPPDPVGLHCYEQLEDSEDEVKVDKQDSQPLTQ<br>HYQILTCCCGCDNSVRLVVECTDGDIRQLQDLLGLTNIVCPICAPKP                                                                         | 11       | QXM18823.1  |
| HPV11*-E5A | MEVVPVQIAAATTTTLILPVVIAFAVCFLSIVLILISDFLVYTSVLVLTLLLYLL<br>LWLLLTPLQFFLLTLCVCYFPAFYIHIVYVQTQQ                                                                               | 11       | QXM18827.1  |
| HPV11*-E5B | MVMLTCHLNDGDTWLFLWLFTAFAVAVLGLLLLHYRAVHGTEKTKCAKC<br>KSNRNTTVDYVYMSHGDNGDYVYMN                                                                                              | 11       | QXM18828.1  |

HPV18\*: Alphapapillomavirus 7: human papillomavirus 18 is a serotype of Alphapapillomavirus 10.  
 HPV6\*: Alphapapillomavirus 10: human papillomavirus 6 and 11 are serotypes of Alphapapillomavirus 10.  
 HPV11\*: Alphapapillomavirus 10: human papillomavirus 6 and 11 are serotypes of Alphapapillomavirus 10
